# Supplementary material for: Identification of Anoikis-related potential biomarkers and therapeutic drugs in chronic thromboembolic pulmonary hypertension via bioinformatics analysis and in vitro experiment
Source: PubMed Central journal article supplement (PMC11680802; doi:10.1038/s41598-024-75251-1), 2024-12-28
Supplement: 41598_2024_75251_MOESM7_ESM.pdf [file 41598_2024_75251_MOESM7_ESM.pdf]

Supplementary Material6:WB

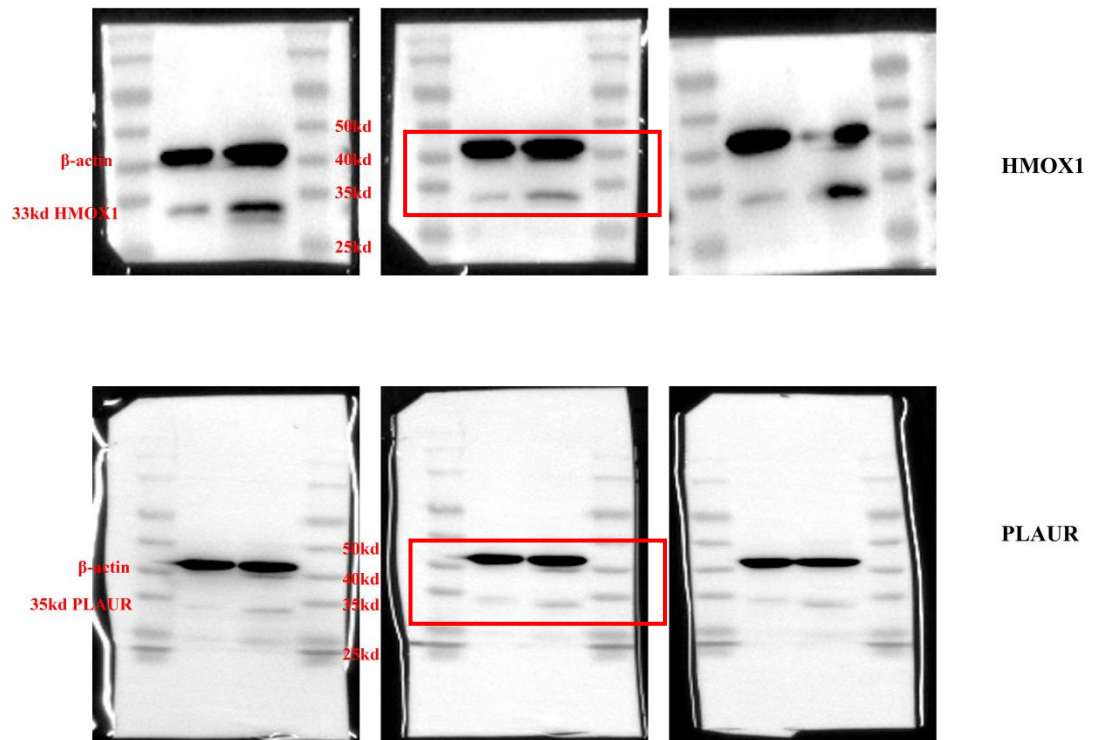

Note: The areas in red boxes are the representative figures in the manuscript.
